# Supplementary material for: Identification of four novel serum protein biomarkers in sepsis patients encoded by target genes of sepsis-related miRNAs
Source: PubMed Central journal article supplement (PMC4202716; doi:10.1042/cs20130301), 2014-03-05
Supplement: cs1260857add.pdf [file cs1260857add.pdf]

## SUPPLEMENTARY ONLINE DATA

# Identification of four novel serum protein biomarkers in sepsis patients encoded by target genes of sepsis-related miRNAs

Hui-juan WANG\*†<sup>1</sup>, Bao-zeng WANG†<sup>1</sup>, Peng-jun ZHANG§<sup>1</sup>, Jie DENG\*||, Zhi-rui ZHAO\*, Xin ZHANG\*, Kun XIAO\*, Dan FENG¶, Yan-hong JIA\*, You-ning LIU\* and Li-xin XIE\*

\*Department of Respiratory Medicine, Chinese PLA General Hospital, Beijing, 100853, China

†Medical College, Nankai University, Tianjin, P. R. 300071, China

‡Department of Respiratory Medicine, the Affiliated Beijing Tiantan Hospital of Capital Medical University, Beijing, 100050, China

§Department of Clinical Biochemistry, Chinese PLA General Hospital, Beijing, 100853, China

||Department of Respiratory Medicine, Beijing Nanyuan Hospital, Beijing, 100076, China

¶Department of Medical Statistics, Chinese PLA General Hospital, Beijing, 100853, China

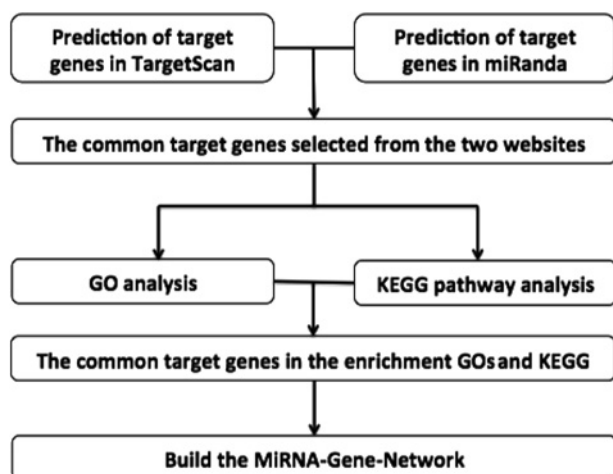

**Figure S1** The flow diagram of the bioinformatics analysis

<sup>1</sup>These authors contributed equally to this work.

**Correspondence:** Dr You-ning Liu or Dr Li-xin Xie (email liuyn301@126.com or xielx@263.net).

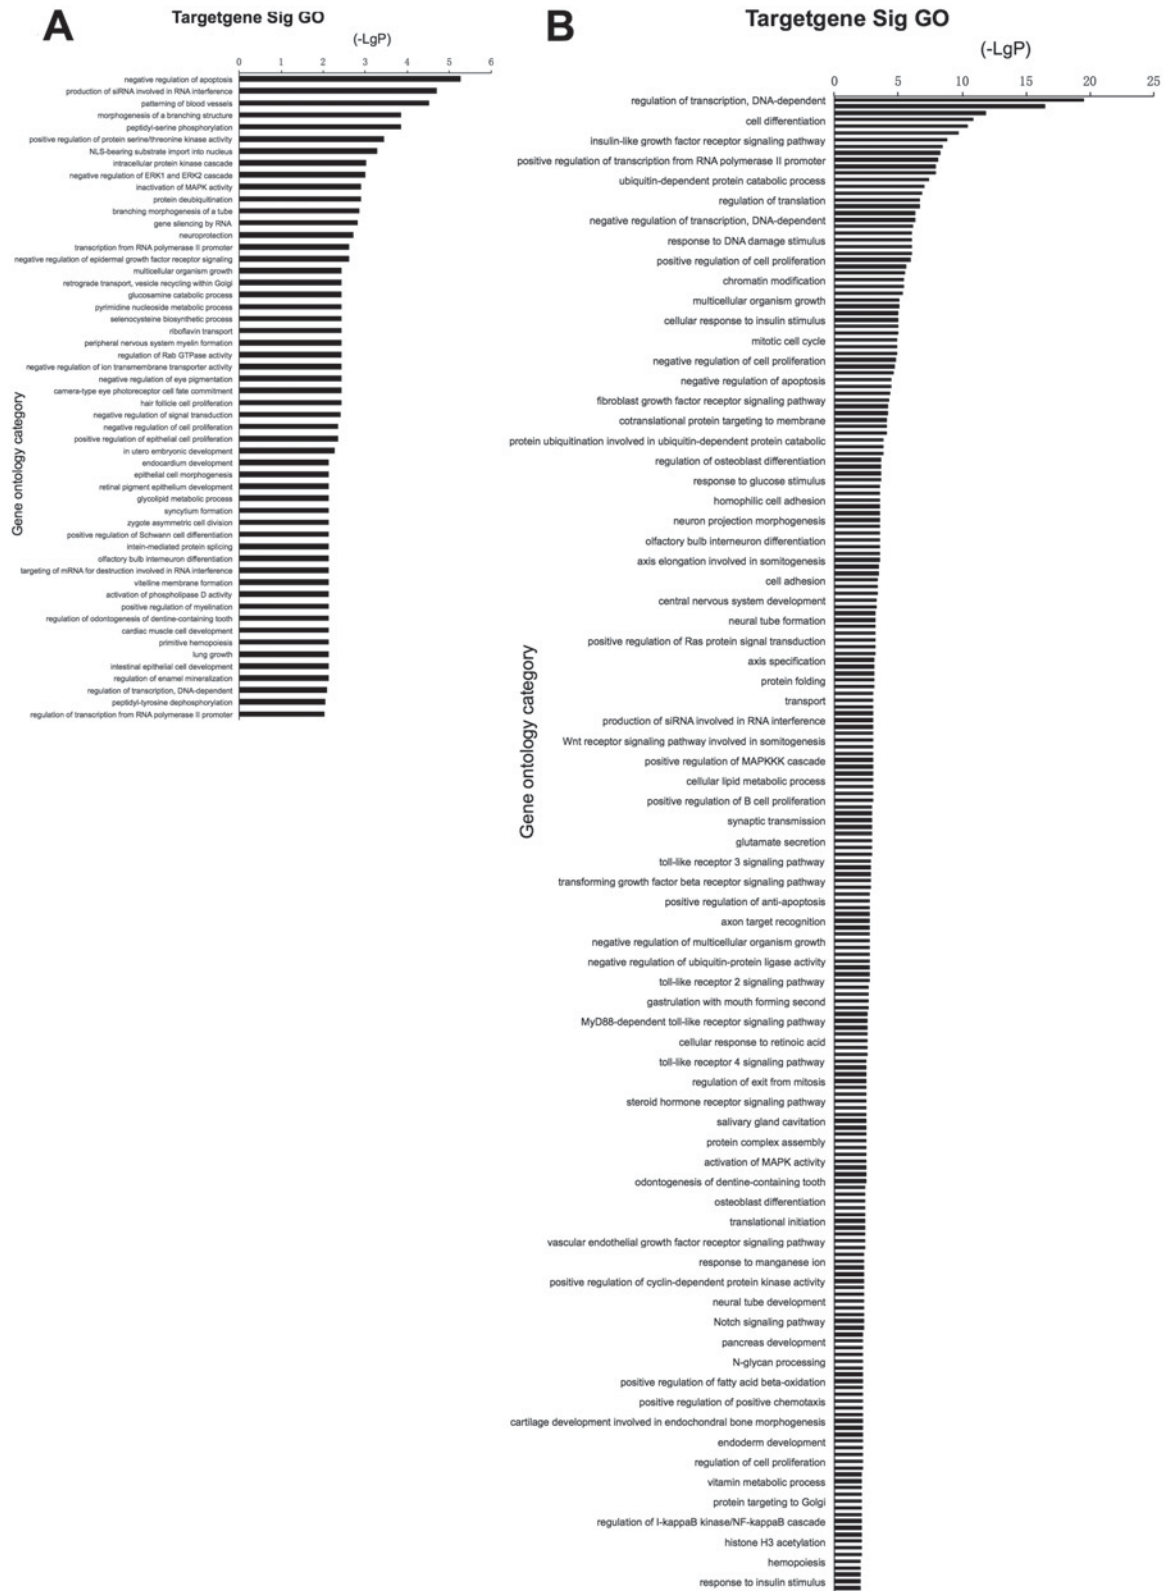

**Figure S2 Significant GO terms of the target genes**  
**(A)** GO terms for the targets of down-regulated miRNAs. **(B)** GO terms for the targets of up-regulated miRNAs.

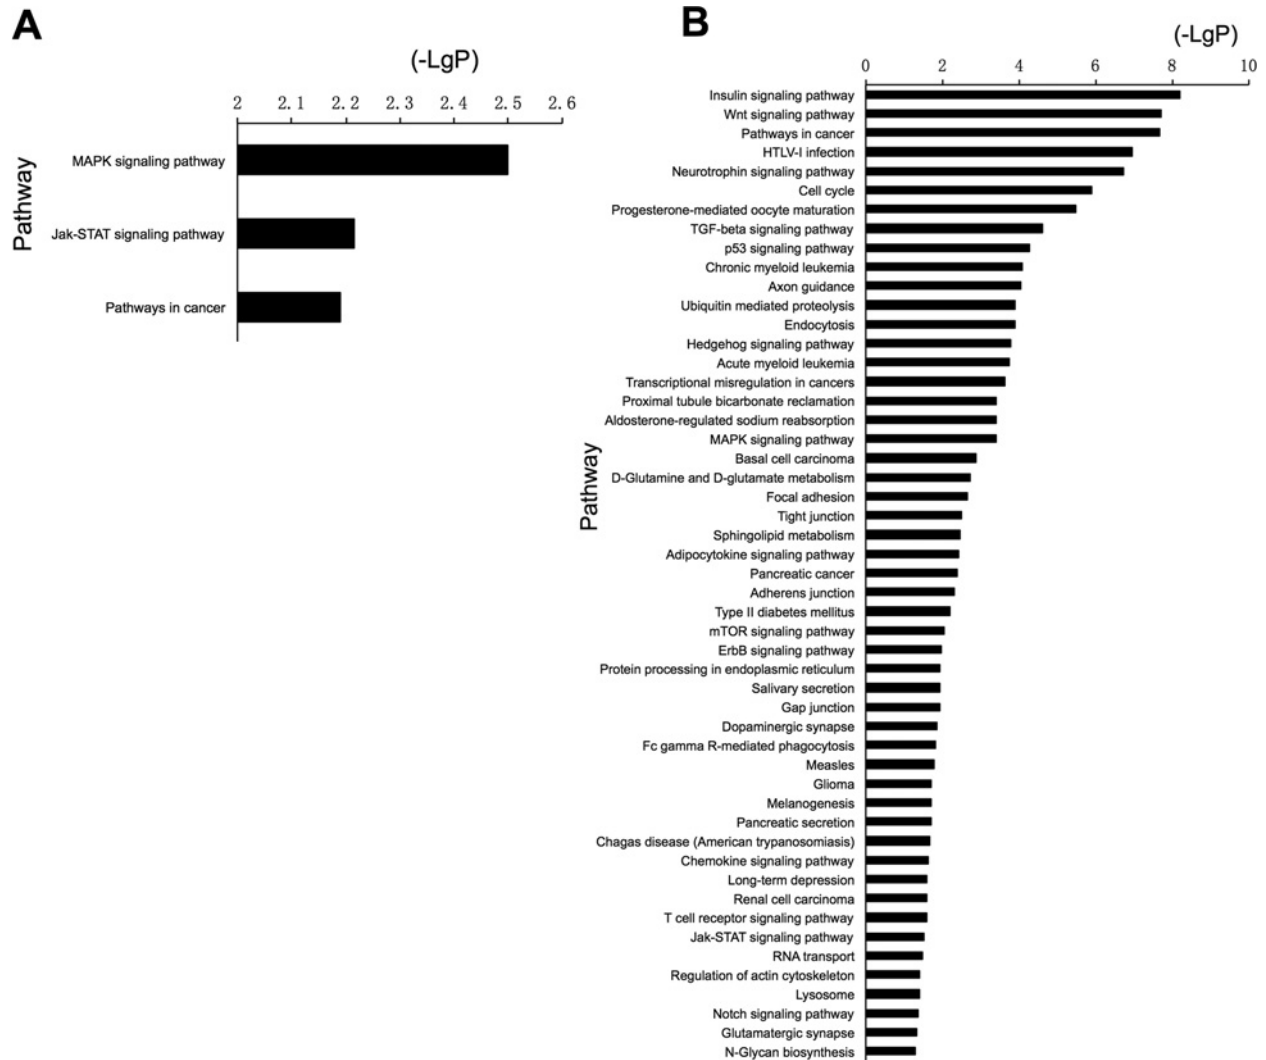

**Figure S3 Significant pathways of the target genes**  
 (A) Pathways for the targets of down-regulated miRNAs. (B) Pathways for the targets of up-regulated miRNAs.

Received 21 June 2013/29 October 2013; accepted 5 December 2013  
 Published as Immediate Publication 5 December 2013, doi: 10.1042/CS20130301
